# Supplementary material
Source: publisher site journal article supplement (https://www.spandidos-publications.com/4803/downloadSupplementary)

Figure S1. General scheme of gated dendritic cells, in order to evaluate their differentiation and maturation by flow cytometry using antibodies CD11c-PE-Cy7, HLA-DR-FITC, CD83-PerCP-Cy5.5. HLA-DR, human MHC class II.

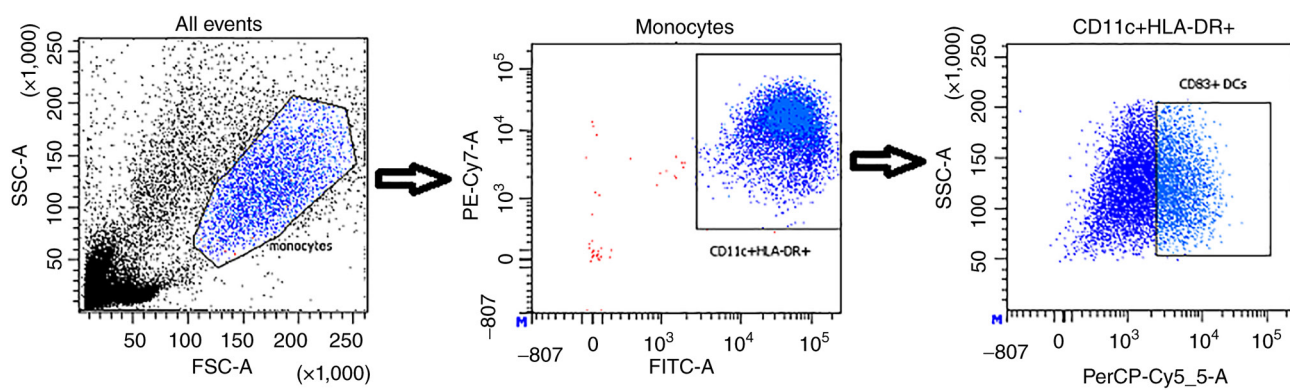

Figure S2. Typical scatter plots, evaluating the efficiency of transfection of mature dendritic cells with the DNA plasmid with the MaTRa-A reagent, using a probe derived from the same plasmid using the Flow-Fish hybridization method. (A) Sample without transfection. (B) Sample with transfection. On the Y axis, lateral light scattering of cells; on the X axis, Atto488 fluorescence via the FITC channel. A probe was added to each sample at a concentration of 3  $\mu\text{g/ml}$ .

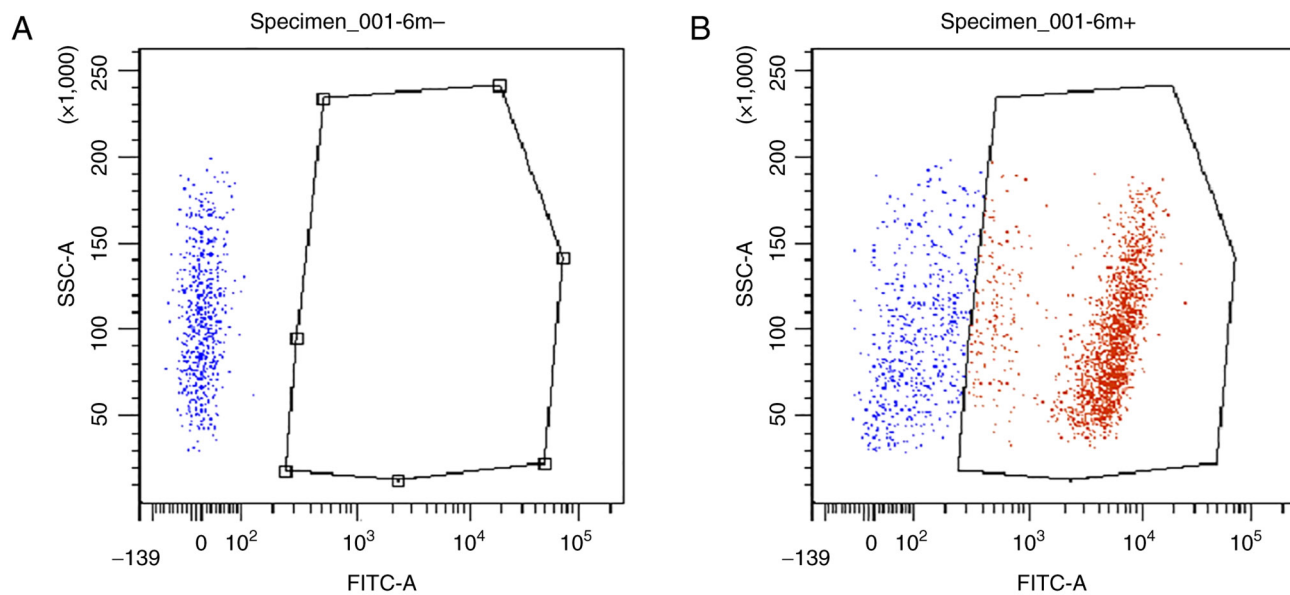

Supplement: Supplementary file 1 [file downloadSupplementary]
